# Supplementary material for: Use of Biolayer Interferometry to Identify Dominant Binding Epitopes of Influenza Hemagglutinin Protein of A(H1N1)pdm09 in the Antibody Response to 2010–2011 Influenza Seasonal Vaccine
Source: MDPI journal article supplement (doi:10.3390/vaccines11081307), 2023-07-31
Supplement: s1 [file s1]

## Supplementary Materials

**Table S1.** Age-dependent dominant binding of K130 or K163 in Ab response to pH1N1 vaccine determined by the f-AbBA-2 and the HI assay.

| Birth year | K130              |      | K163     |      |
|------------|-------------------|------|----------|------|
|            | f-AbBA-2          | HI   | f-AbBA-2 | HI   |
| 1966-1979  | 1/10 <sup>a</sup> | 1/10 | 6/10     | 6/10 |
| 1981-1991  | 6/9               | 4/9  | 2/9      | 2/9  |

<sup>a</sup> Number of post-vaccination serum samples with dominant response to the indicated residue over total number of donors in the age group.

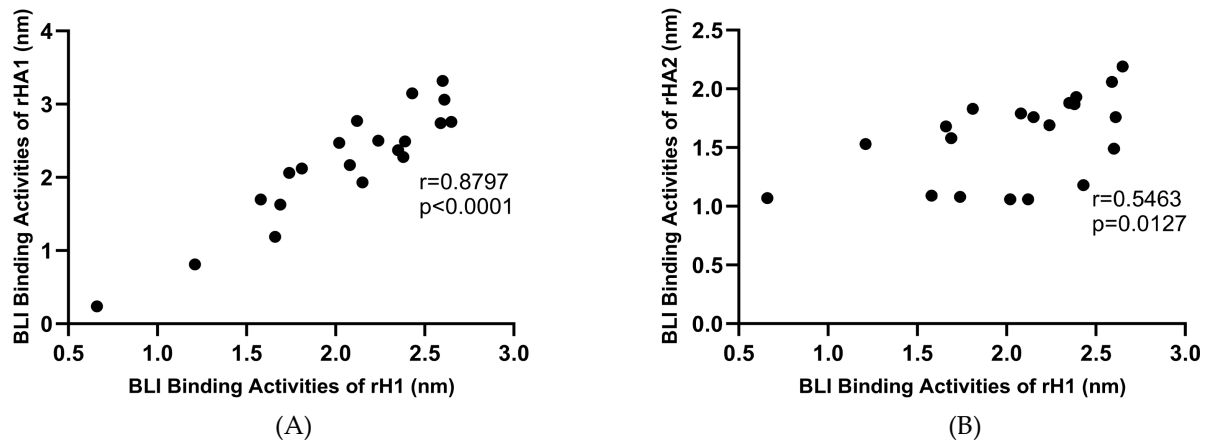

**Figure S1.** Correlations of the BLI bindings of rH1 to that of rHA1 or rHA2 for the post-vaccination sera. Correlations of the BLI bindings of rH1 to that of rHA1 (A) or rHA2 (B) for the post-vaccination sera were analyzed. Statistical significance was determined using a two-tailed Spearman correlation coefficient ( $r$ ) test with  $r$  plus  $p$  values shown.
